# Supplementary material for: MicroRNAs in tear fluids predict underlying molecular changes associated with Alzheimer’s disease
Source: Life Sci Alliance. 2023 Mar 20;6(6):e202201757. doi: 10.26508/lsa.202201757 (PMC10027899; doi:10.26508/lsa.202201757)
Supplement: Supplementary file 1 [file LSA-2022-01757_TableS1.xlsx]

## Sheet: Table S1
	miRNAs	Differentially expressed miRNAs
		Tg vs. NTg (young)						Tg vs. NTg (old)
		OB		BS		CB		OB		BS		CB
		Log2[FC]	P value	Log2[FC]	P value	Log2[FC]	P value	Log2[FC]	P value	Log2[FC]	P value	Log2[FC]	P value
	miR-101a	-0.759345	0.00186883	-0.19604	0.42556	0.133334	0.52584	-4.35536	0.00155256	-1.79099	0.00335725	-3.82139	0.00232224
	miR-125b	-0.887171	0.0104109	-0.154489	0.665682	1.61243	0.0358893	3.23691	0.00872038	-1.85022	0.000865817	2.59719	0.045201
	miR-140	-0.763917	0.0316779	0.549708	0.295241	-1.01154	0.0157383	-5.88742	0.00207181	-3.11441	0.00175883	-1.11116	0.011244
	miR-146a	-0.787545	0.00959891	0.109191	0.416425	0.211512	0.666534	6.85703	0.00131789	-2.83447	<0.001	3.42574	0.00155515
	miR-15a	-2.10482	<0.001	-0.985045	0.227487	-0.06136	0.855023	3.10432	0.000905347	-2.56033	<0.001	-0.354071	0.397902
	miR-342	-0.818892	0.00583993	-0.350082	0.379793	0.570631	0.125573	1.52792	0.00296941	-1.53798	0.00136896	3.02063	0.0214082
	miR-34a	-1.95097	0.00225304	-0.339451	0.129549	0.331369	0.203291	-0.251545	0.0877567	-3.90549	0.00339306	-0.889283	0.0256204
	miR-374c	-2.36079	0.000807718	-0.0910149	0.748974	-0.67327	0.235204	3.69099	0.0180652	0.500861	0.269253	1.06591	0.0856449
	Table S1. miRNAs relative expression levels in olfactory bulb, brainstem and cerebellum. Tg young (n = 4, 12-16 weeks, females) and old (n = 4, 36-40 weeks, femlaes) mice were compared with respective age and sex matched NTg siblings. Differentially expressed miRNAs are indicated (Bold text) based on P<0.05 (Welch’s t-test, 2-tailed) and log2[FC] >1.0 considered as upregulated and log2[FC] <-1.0 …
	(Tg- Transgenic APP-PS1 mice; NTg- Non-carrier siblings; FC- Fold Change; OB- Olfactory bulb; BS- Brainstem; CB- Cerebellum)
