# Supplementary material for: MicroRNAs in tear fluids predict underlying molecular changes associated with Alzheimer’s disease
Source: Life Sci Alliance. 2023 Mar 20;6(6):e202201757. doi: 10.26508/lsa.202201757 (PMC10027899; doi:10.26508/lsa.202201757)
Supplement: Supplementary file 2 [file LSA-2022-01757_TableS2.xlsx]

## Sheet: Table S2
	miRNAs	Differentially expressed miRNAs
		Tg vs. WT (young)						Tg vs. WT (old)
		OB		BS		CB		OB		BS		CB
		Log2[FC]	P value	Log2[FC]	P value	Log2[FC]	P value	Log2[FC]	P value	Log2[FC]	P value	Log2[FC]	P value
	miR-101a	2.98777	0.00424792	-1.40606	<0.001	1.10905	0.0147575	-2.70839	<0.001	0.467975	0.373381	-3.13891	0.00682352
	miR-125b	-4.60438	0.0972452	-0.23448	0.403704	2.32919	0.0349777	4.17471	0.00804242	1.17121	0.0747981	4.7141	0.0346075
	miR-140	-1.69957	0.0457365	-1.25956	0.00415846	0.16942	0.193227	-4.84472	0.00880166	-0.855924	0.0586678	-0.58204	0.106518
	miR-146a	-5.88335	0.0289554	-1.4383	<0.001	1.12441	0.00868269	8.28724	0.00130503	-0.164082	0.551059	6.01757	0.00176869
	miR-15a	-3.99399	0.0294254	-2.09051	0.00129257	0.912173	0.0186388	4.70653	0.000789758	0.790969	0.190441	2.05546	0.0213829
	miR-342	-5.44991	0.0199937	-1.15548	0.00388069	0.424168	0.0887535	0.246804	0.0934225	-1.9355	0.00147414	1.2637	0.0475206
	miR-34a	-4.54484	0.0186389	-3.03997	0.0103139	1.22969	0.0258835	-0.577558	0.0176835	-0.67764	0.0623492	1.20206	0.0620083
	miR-374c	-4.63075	0.109601	-0.336704	0.322631	0.45092	0.540277	5.39456	0.0168244	2.63906	0.0497735	2.47077	0.0413393
	Table S2. miRNAs relative expression levels in olfactory bulb, brainstem and cerebellum. Tg young (n = 4, 12-16 weeks, females) and old (n = 4, 36-40 weeks, females) mice were compared with respective age and sex matched WT controls. Differentially expressed miRNAs are indicated (Bold text) based on P<0.05 (Welch’s t-test, 2-tailed) and log2[FC] >1.0 considered as upregulated and log2[FC] <-1.0 c…
	(Tg- Transgenic APP-PS1 mice; WT- C57BL/6J wildtype control; FC- Fold Change; OB- Olfactory bulb; BS- Brainstem; CB- Cerebellum)
