# Supplementary material for: MicroRNAs in tear fluids predict underlying molecular changes associated with Alzheimer’s disease
Source: Life Sci Alliance. 2023 Mar 20;6(6):e202201757. doi: 10.26508/lsa.202201757 (PMC10027899; doi:10.26508/lsa.202201757)
Supplement: Supplementary file 4 [file LSA-2022-01757_TableS4.xlsx]

## Sheet: Table S4
	miRNAs	Differentially expressed miRNAs
		Old vs. Young Tg						Old vs. Young NTg						Old vs. Young WT
		OB		BS		CB		OB		BS		CB		OB		BS		CB
		Log2[FC]	P value	Log2[FC]	P value	Log2[FC]	P value	Log2[FC]	P value	Log2[FC]	P value	Log2[FC]	P value	Log2[FC]	P value	Log2[FC]	P value	Log2[FC]	P value
	miR-101a	-4.04313	0.00359289	-1.88847	0.0059785	-4.7326	0.00700014	-0.447115	0.00857516	-0.293516	0.235102	-0.777875	0.0482423	1.65303	<0.001	-3.7625	<0.001	-0.484638	0.0325281
	miR-125b	2.99693	0.00786962	-1.42554	0.0245826	2.28854	0.0458379	-1.12715	<0.001	0.27019	0.299537	1.30378	0.0116065	-5.78217	0.0933964	-2.83123	<0.001	-0.096366	0.633813
	miR-140	-5.64565	<0.001	-2.60525	<0.001	-0.864522	0.0295894	-0.522148	0.0434026	1.05887	0.0380699	-0.764896	0.0241486	-2.5005	0.0318509	-3.00889	<0.001	-0.113062	0.324554
	miR-146a	7.19656	0.00130896	-1.5249	0.00109724	4.42211	0.00181989	-0.448012	0.0330616	1.41877	<0.001	1.20788	0.0317563	-6.97403	0.0284677	-2.79911	<0.001	-0.471046	0.00541281
	miR-15a	3.77704	<0.001	-0.424985	0.430781	0.625818	0.0955479	-1.4321	<0.001	1.1503	0.0179676	0.918529	0.123394	-4.92348	0.027861	-3.30646	<0.001	-0.51747	0.164865
	miR-342	1.02269	0.00144158	-2.38478	0.00595483	1.12761	0.0454118	-1.32413	0.00736749	-1.19688	0.0360213	-1.32239	0.0902734	-4.67403	0.0206489	-1.60475	<0.001	0.288076	0.113596
	miR-34a	-0.00611647	0.966174	-1.47815	0.00134261	-0.138004	0.622539	-1.70554	0.00332338	2.0879	<0.001	1.08265	0.0056178	-3.9734	0.01942	-3.84047	0.000519445	-0.110374	0.308479
	miR-374c	3.58952	0.0181395	1.62394	0.0274451	3.45843	0.0304752	-2.46226	0.000918285	1.03206	0.00413955	1.71925	0.0128606	-6.43579	0.104303	-1.35182	0.0162325	1.43858	0.00142899
	Table S4. miRNAs relative expression levels in olfactory bulb, brainstem and cerebellum with disease progression and/ or ageing. Old ((n = 4 per group, 36-40 weeks, females) Tg mice, NTg siblings and WT controls were compared with young (n = 4 per group, 12-16 weeks, females) Tg mice, NTg siblings and WT controls, respectively. Differentially expressed miRNAs are indicated (Bold text) based on P<…
	(Tg- Transgenic APP-PS1 mice; NTg- Non-carrier siblings; WT- C57BL/6J wildtype controls; FC- Fold Change; OB- Olfactory bulb; BS- Brainstem; CB- Cerebellum)
